# Supplementary material for: Habitat Suitability Modeling to Inform Seascape Connectivity Conservation and Management
Source: MDPI journal article supplement (doi:10.3390/d13100465), 2021-09-26
Supplement: s1 [file s1]

Archive with 1 entries (1 files):
- diversity-1385396 Supplementary Materials.pdf
