# Supplementary material for: Habitat Suitability Modeling to Inform Seascape Connectivity Conservation and Management
Source: MDPI journal article supplement (doi:10.3390/d13100465), 2021-09-26
Supplement: s1 [file s1 › diversity-1385396 Supplementary Materials.pdf]

### Supplementary Materials

**Supplementary Table S1.** Variance Inflation Factors. Collinearity among spatial predictors was assessed using variance inflation factor (VIF) scores and Pearson pairwise correlation coefficients ( $r$ ). Predictors were retained for modeling if they fell below thresholds of 5 and  $|0.7|$  for VIF and  $r$ , respectively. See Table 1 in the main text for variable descriptions and Supplementary Figures 1 and 2 for correlation matrices.

| Spatial Predictor                      | VIF (Full Predictor Set) | VIF (Retained Predictor Set) |
|----------------------------------------|--------------------------|------------------------------|
| Benthic Habitat                        | 1.19                     | 1.16                         |
| Distance to Mangrove                   | 1.35                     | 1.29                         |
| Depth                                  | 2.74                     | 2.63                         |
| Depth (Standard Deviation)             | 688.05                   | -                            |
| Slope                                  | 645.26                   | 1.69                         |
| Curvature                              | 2.12                     | 1.07                         |
| Plan Curvature                         | 2.16                     | -                            |
| Rugosity                               | 4.03                     | 1.43                         |
| Broad Scale Bathymetric Position Index | 1.75                     | 1.78                         |
| Fine Scale Bathymetric Position Index  | 1.15                     | 1.16                         |
| Winter Temperature                     | 2.92                     | 2.20                         |
| Winter Salinity                        | 8.15                     | 2.46                         |
| Winter Dissolved Oxygen                | 3.15                     | -                            |
| Summer Temperature                     | 1.86                     | 1.79                         |
| Summer Salinity                        | 2.08                     | 1.70                         |
| Summer Dissolved Oxygen                | 6.32                     | -                            |

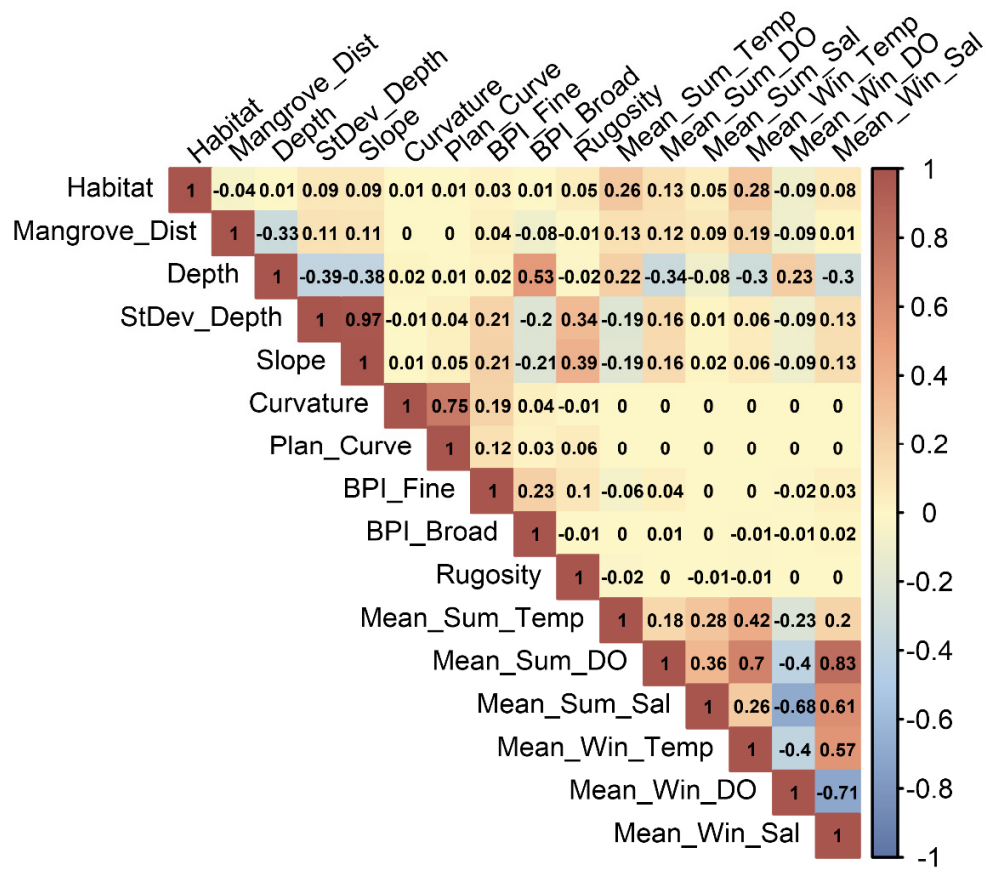

**Supplementary Figure S1.** Pearson pairwise correlation matrix of all available spatial predictors. A correlation threshold of  $|0.7|$  was used in concert with a VIF threshold of 5 to remove collinear variables (see Supplementary Table 1). Abbreviations as follows: Dist = Distance, St\_Dev = Standard Deviation, Curve = Curvature, BPI = Bathymetric Position Index, Sum = Summer, Win = Winter, Temp = Temperature, Sal = Salinity, DO = Dissolved Oxygen.

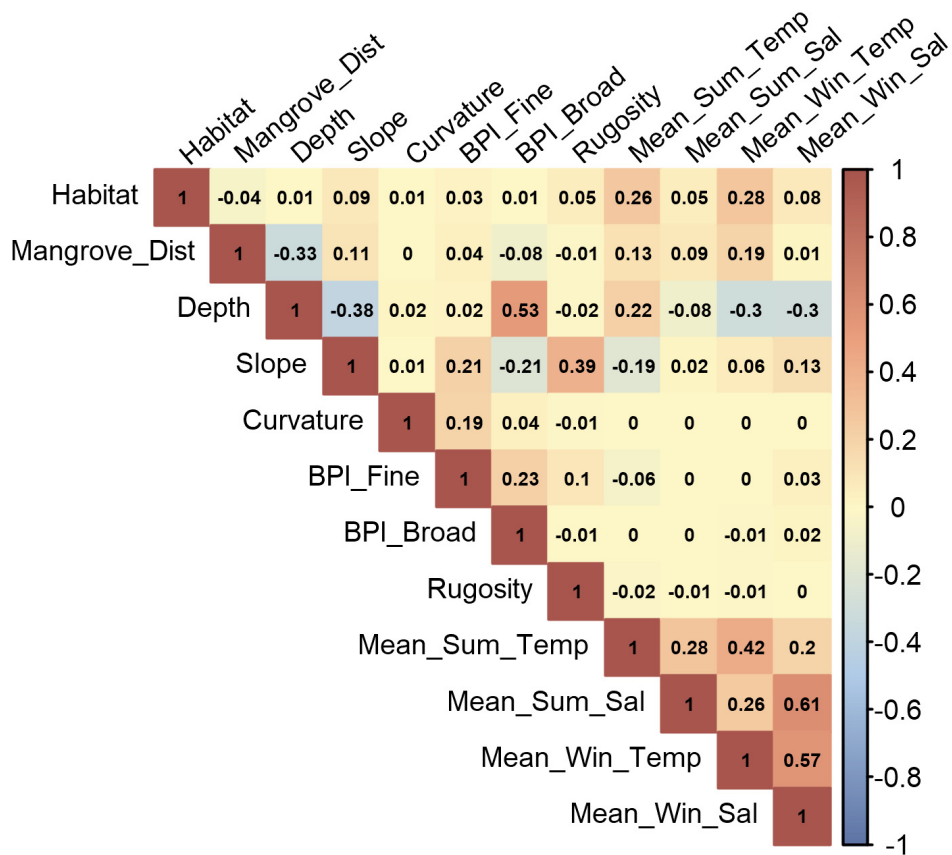

**Supplementary Figure S2.** Pearson pairwise correlation matrix of spatial predictors retained for habitat suitability modeling. A correlation threshold of  $|0.7|$  was used in concert with a VIF threshold of 5 to remove collinear variables (see Supplementary Table 1). Abbreviations as follows: Dist = Distance, BPI = Bathymetric Position Index, Sum = Summer, Win = Winter, Temp = Temperature, Sal = Salinity.

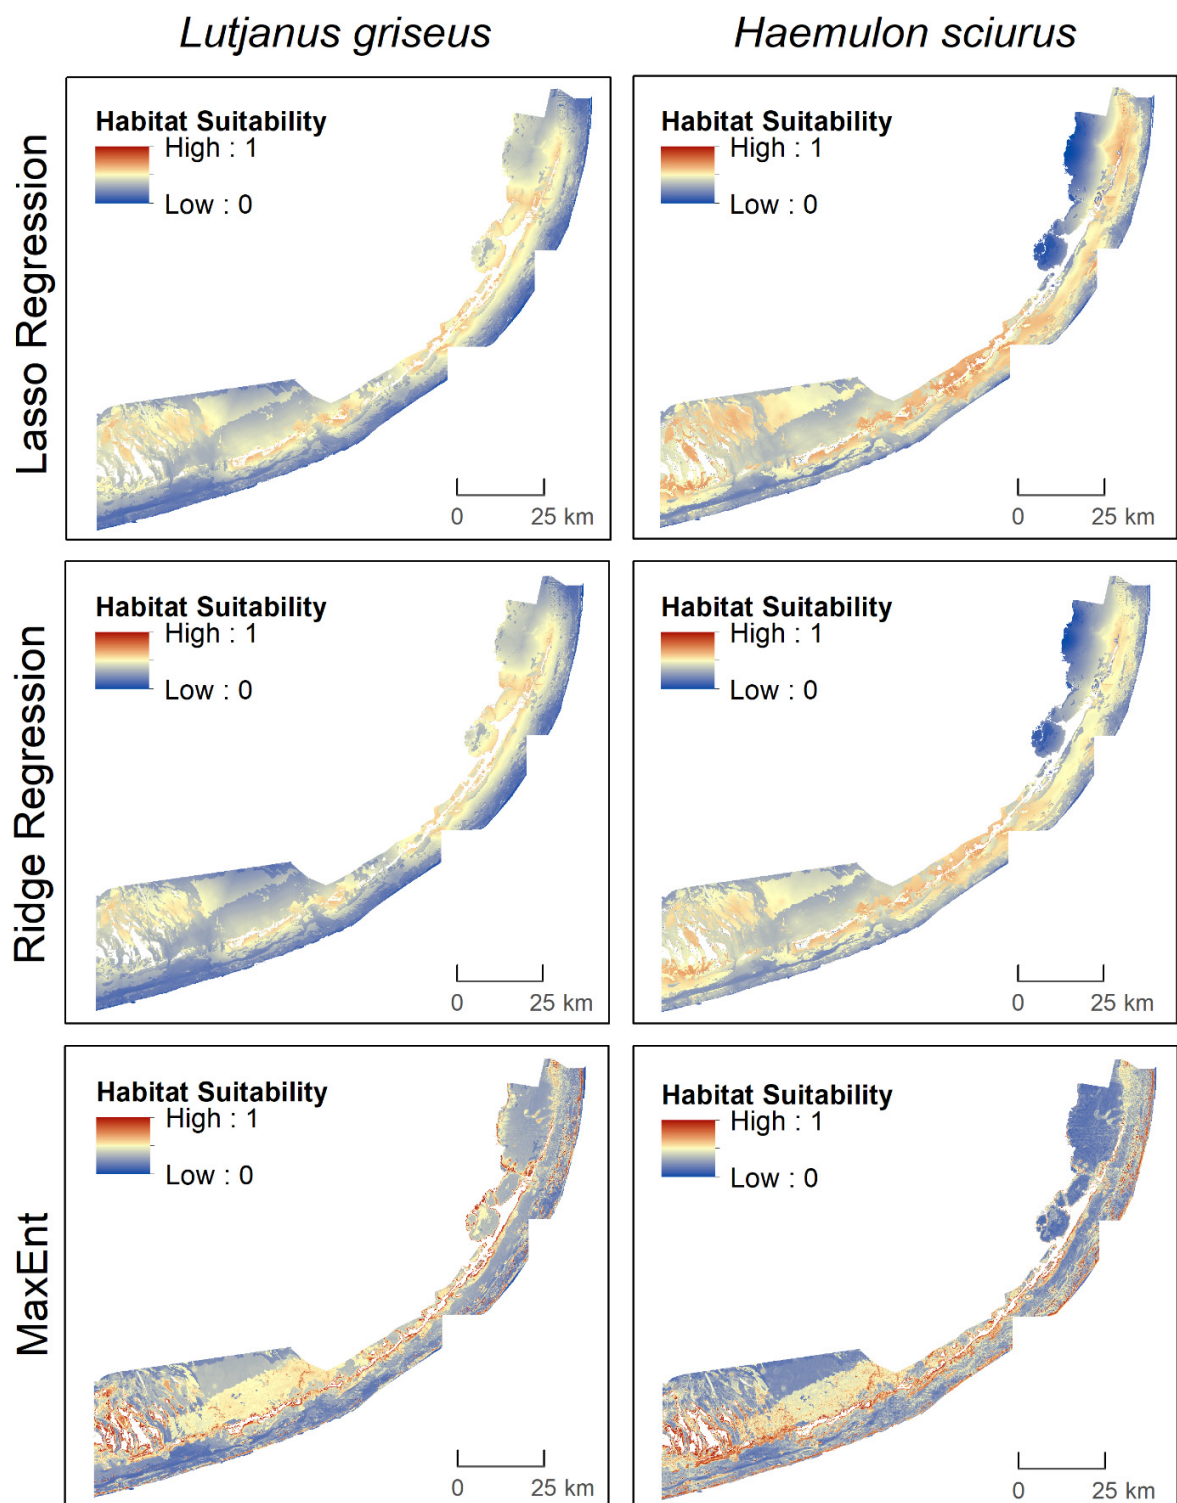

**Supplementary Figure S3.** Lasso-penalized logistic regression, ridge-penalized logistic regression, and MaxEnt predictions of habitat suitability for sub-adult gray snapper (*Lutjanus*

*griseus*) and bluestriped grunt (*Haemulon sciurus*) in the Florida Keys, United States of America (USA).

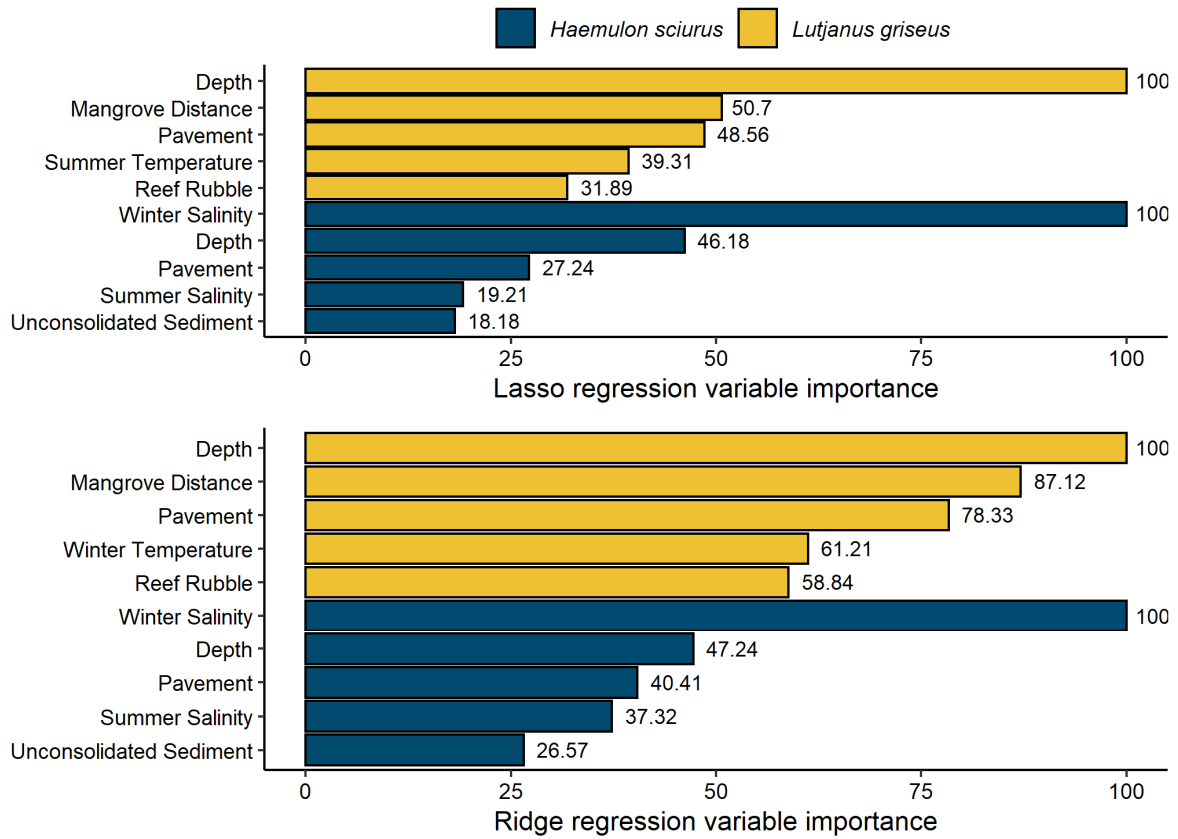

**Supplementary Figure S4.** Plots of the top five most influential predictors of sub-adult gray snapper (*Lutjanus griseus*) and bluestriped grunt (*Haemulon sciurus*) suitability according to lasso- and ridge-penalized logistic regressions. Variable importance (scaled 0 to 100) was quantified by ranking each spatial predictor by the magnitude of their standardized coefficients.

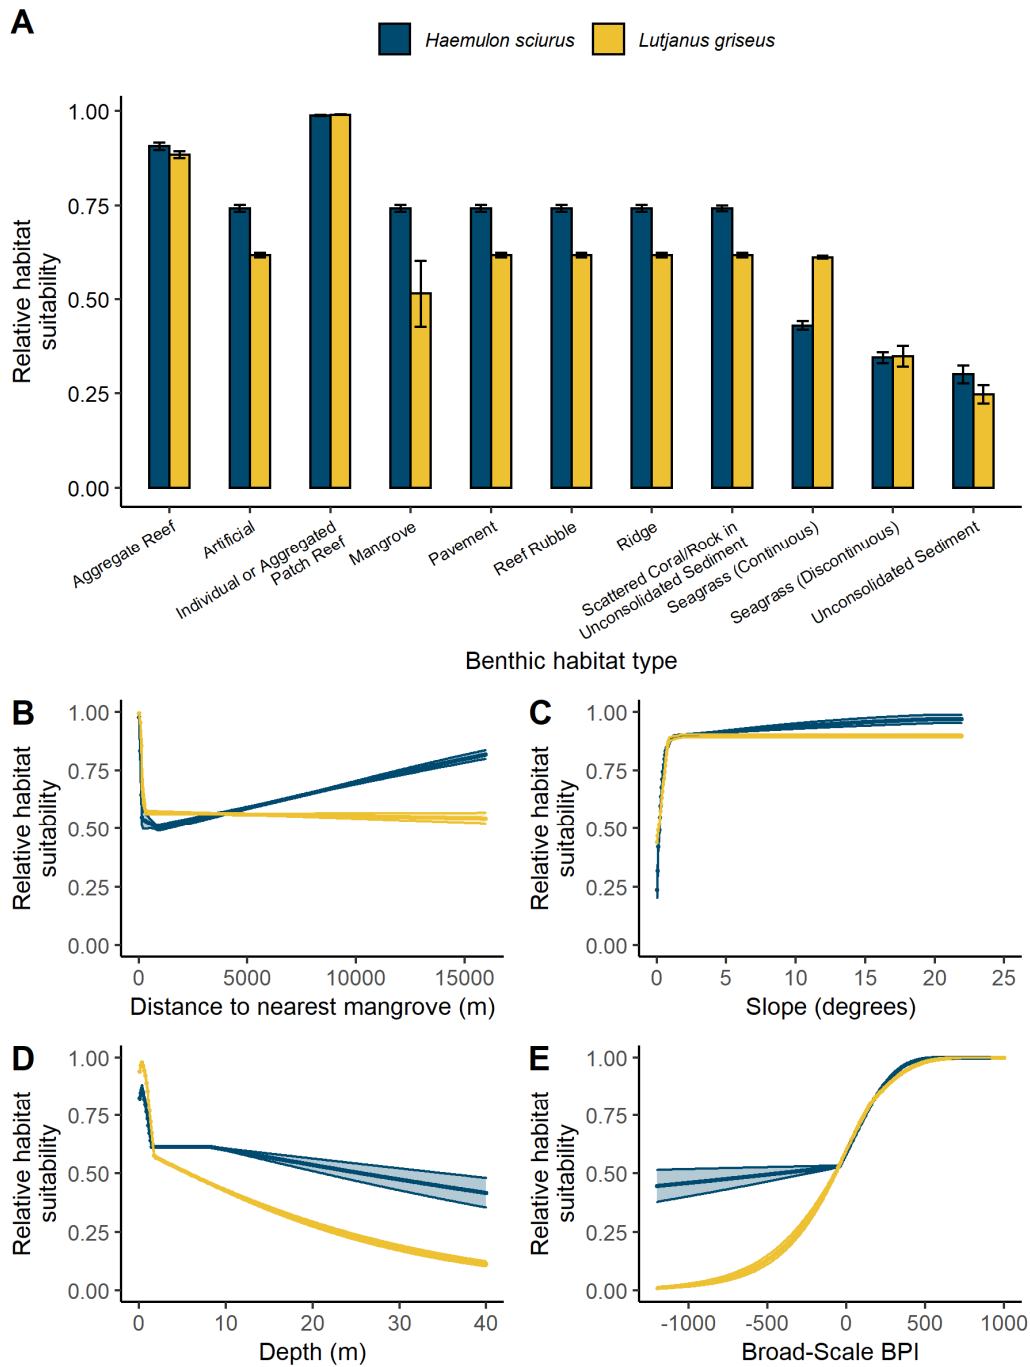

**Supplementary Figure S5.** MaxEnt response curves displaying the relationship between predicted relative habitat suitability for sub-adult gray snapper (*Lutjanus griseus*) and bluestriped grunt (*Haemulon sciurus*) and the values of the five most influential predictors: (A) benthic habitat type, (B) Euclidean distance to the nearest mangrove, (C) slope, (D) depth, and (E) broad-scale bathymetric position index (BPI). Each curve represents a different MaxEnt model created using only the corresponding variable, displayed as the mean  $\pm$  one standard deviation calculated over 10 cross-validation folds.
